# Supplementary material for: The community atmospheric chemistry box model CAABA/MECCA-4.0
Source: Copernicus journal article supplement (doi:10.5194/gmd-12-1365-2019), 2019-04-05
Supplement: Supplementary file 3 [file gmd-12-1365-2019-supplement.zip]

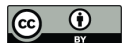

## *Supplement of*

# **The community atmospheric chemistry box model CAABA/MECCA-4.0**

**Rolf Sander et al.**

*Correspondence to:* Rolf Sander ([rolf.sander@mpic.de](mailto:rolf.sander@mpic.de))

- [gmd-12-1365-2019-supplement-title-page.pdf](#)
- [caaba\\_4.0](#)
  - CHANGELOG
  - LICENSE
  - Makefile
  - README
  - `_internal_links.tcsh`
  - `_update_internal_links.tcsh`
  - `_validate.tcsh`
  - `_zipcaaba.tcsh`
  - `caaba.f90`
  - `caaba.nml`
  - `caaba_io.f90`
  - `caaba_io_ascii.inc`
  - `caaba_io_netcdf.inc`
  - `caaba_mecca_a_end.dat`
  - `caaba_mem.f90`
  - `caabaplot.py`
  - `cloudj.nml`
  - `cmg`
  - `depend.mk`
  - `dissoc.nml`
  - `input`
    - \* `cloudj`

- \* dissoci
- \* example\_init\_spec.nc
- \* example\_init\_spec.txt
- \* example\_init\_volcano.nc
- \* example\_init\_volcano.txt
- \* example\_input\_readj.nc
- \* multirun
- \* radjimt
- \* traject
- \* txt2nc.py
- jnl
  - \* README
  - \* \_acidbase\_equil2\_0d\_a01.jnl
  - \* \_acidbase\_equil2\_0d\_a02.jnl
  - \* \_acidbase\_equil\_0d\_a01.jnl
  - \* \_acidbase\_equil\_0d\_a02.jnl
  - \* \_families\_a.jnl
  - \* \_henry\_equil\_0d.jnl
  - \* \_mecca\_spc.jnl
  - \* \_myrxnrates.jnl
  - \* \_plot\_rxnrates.jnl
  - \* \_plot\_rxnrates\_scaled.jnl
  - \* acidbase\_equil\_0d.jnl
  - \* henry\_equil.jnl
  - \* jval-cloudj.jnl
  - \* jval-sappho.jnl
  - \* jval.jnl
  - \* messy.jnl
  - \* montecarlo.jnl
  - \* photo.jnl
  - \* rxnrates.jnl
  - \* rxnrates\_scaled.jnl
  - \* scatterplot\_mc.jnl
  - \* setmodelrun.jnl
  - \* sizebins.jnl
  - \* tools
  - \* xxxa.jnl
  - \* xxxg.jnl
- jval.nml
- main.mk
- manual
  - \* Makefile
  - \* box\_model\_static.odg
  - \* box\_model\_static.pdf
  - \* box\_model\_trajec.odg
  - \* box\_model\_trajec.pdf
  - \* caaba\_flowcontrol.odg

- \* caaba\_flowcontrol.pdf
- \* caaba\_mecca\_logo\_print.pdf
- \* caaba\_mecca\_manual.idx
- \* caaba\_mecca\_manual.ilg
- \* caaba\_mecca\_manual.ind
- \* caaba\_mecca\_manual.pdf
- \* caaba\_mecca\_manual.tex
- \* caaba\_sketch.odg
- \* caaba\_sketch.pdf
- \* caaba\_use\_diagr.odg
- \* caaba\_use\_diagr.pdf
- \* chem.sty
- \* doxygen
- \* flowcontrol\_xcaaba.odg
- \* flowcontrol\_xcaaba.pdf
- \* getwords
- \* kpp\_use\_diagr.odg
- \* kpp\_use\_diagr.pdf
- \* mecca\_Br.pdf
- \* mecca\_info.tex
- \* meccanism.pdf
- \* modular-mecca.odg
- \* modular-mecca.pdf
- \* myindex.ist
- \* polymecca\_use\_diagr.odg
- \* polymecca\_use\_diagr.pdf
- \* presentation
- \* random.pdf
- \* steady\_state\_model.odg
- \* steady\_state\_model.pdf
- \* traject\_model.odg
- \* traject\_model.pdf

– mecca

- \* aerosol.awk
- \* aqueous.eqn
- \* aqueous.spc
- \* batch
- \* check\_eqns.pl
- \* check\_eqns.pl.in
- \* check\_eqns.py
- \* check\_eqntags.py
- \* decomp
- \* diagtrac
- \* eqn
- \* gas.eqn
- \* gas.spc
- \* gpl.txt

- \* graphtool
- \* graphviz
- \* integr.kpp
- \* kpp
- \* latex
- \* mcfct.awk
- \* mecca.eqn
- \* mecca.spc
- \* messy\_mecca\_c2mr\_si.inc
- \* messy\_mecca\_idt\_si.inc
- \* messy\_mecca\_kpp.kpp
- \* messy\_mecca\_mr2c\_si.inc
- \* messy\_mecca\_poly\_si.f90
- \* messy\_mecca\_trac\_si.inc
- \* nodiag.tcsh
- \* process\_aqueous.tbl
- \* process\_gas.tbl
- \* replace.awk
- \* rpl
- \* rxn2mpl.awk
- \* rxnrates.awk
- \* smcl
- \* spc2jnl.awk
- \* spc2mpl.awk
- \* substitute.awk
- \* tag
- \* template\_messy\_mecca\_kpp.f90
- \* template\_messy\_mecca\_poly\_si.f90
- \* tracdef.tbl.awk
- \* tracer
- \* xmecca
- \* xpolymecca
- mecca.nml
- messy\_cloudj.f90
- messy\_cloudj\_box.f90
- messy\_cloudj\_cld\_sub\_mod.f90
- messy\_cloudj\_fjx\_cmn\_mod.f90
- messy\_cloudj\_fjx\_init\_mod.f90
- messy\_cloudj\_fjx\_sub\_mod.f90
- messy\_cmn\_photol\_mem.f90
- messy\_dissoc.f90
- messy\_dissoc\_box.f90
- messy\_jval.f90
- messy\_jval\_box.f90
- messy\_jval\_jvpp.inc
- messy\_main\_blather.f90

- messy\_main\_constants\_mem.f90
- messy\_main\_control\_cb.f90
- messy\_main\_rnd.f90
- messy\_main\_rnd\_lux.f90
- messy\_main\_rnd\_mtw.f90
- messy\_main\_rnd\_mtw\_ja.f90
- messy\_main\_timer.f90
- messy\_main\_tools.f90
- messy\_main\_tools\_kp4\_compress.f90
- messy\_main\_tracer.f90
- messy\_main\_tracer\_chemprop.inc
- messy\_mecca.f90
- messy\_mecca\_aero.f90
- messy\_mecca\_box.f90
- messy\_mecca\_khet.f90
- messy\_mecca\_kpp.f90
- messy\_mecca\_kpp\_function.f90
- messy\_mecca\_kpp\_global.f90
- messy\_mecca\_kpp\_initialize.f90
- messy\_mecca\_kpp\_integrator.f90
- messy\_mecca\_kpp\_jacobian.f90
- messy\_mecca\_kpp\_jacobiansp.f90
- messy\_mecca\_kpp\_linearalgebra.f90
- messy\_mecca\_kpp\_monitor.f90
- messy\_mecca\_kpp\_parameters.f90
- messy\_mecca\_kpp\_precision.f90
- messy\_mecca\_kpp\_rates.f90
- messy\_mecca\_kpp\_util.f90
- messy\_radjimt.f90
- messy\_radjimt\_box.f90
- messy\_readj.f90
- messy\_readj\_box.f90
- messy\_sappho.f90
- messy\_sappho\_box.f90
- messy\_semidep\_box.f90
- messy\_traject\_box.f90
- montecarlo
  - \* mcexp\_seed.txt
  - \* montecarlo.tcsh
- nc\_parser.bash
- ncv
- nml

- \* caaba\_barrow.nml
- \* caaba\_example.nml
- \* caaba\_free\_trop.nml
- \* caaba\_frostflower.nml
- \* caaba\_isoo\_o3box.nml
- \* caaba\_lab.nml
- \* caaba\_lab\_nox.nml
- \* caaba\_mbl.nml
- \* caaba\_mcfct.nml
- \* caaba\_mom.nml
- \* caaba\_mtchem.nml
- \* caaba\_photo.nml
- \* caaba\_simple.nml
- \* caaba\_strato.nml
- \* caaba\_traject.nml
- \* caaba\_volcano.nml
- \* caaba\_zeroair.nml
- \* user\_contributed
- output
- pycaaba
  - \* README
  - \* \_\_init\_\_.py
  - \* \_mecca\_spc.py
  - \* caabaplot.py
  - \* caabatools.py
  - \* mecca.py
  - \* montecarlo.py
  - \* multirun.py
  - \* pyteetime.py
  - \* radjimt.py
  - \* rstools.py
  - \* viewport.py
- radjimt.nml
- sfmakedepend
- skeleton
  - \* EQN\_NAMES.dat
  - \* EQN\_TAGS.dat
  - \* Makefile
  - \* OIC.dat
  - \* README
  - \* StoichNum.dat
  - \* ctrl
  - \* depend.mk
  - \* drgep.f90
  - \* graph\_search.f90
  - \* m\_mrgref.f90

- \* messy\_main\_constants\_mem.f90
- \* messy\_mecca\_kpp\_function.f90
- \* messy\_mecca\_kpp\_monitor.f90
- \* messy\_mecca\_kpp\_parameters.f90
- \* messy\_mecca\_kpp\_precision.f90
- \* oic.f90
- \* samplepoints
- \* sfmakedepend
- \* skeleton.bat
- \* skeleton.rpl
- \* targets.txt
- \* xskeleton.py
- testsuite
  - \* README
  - \* cams
  - \* radjimt-00
  - \* radjimt-50
  - \* radjimt.pdf
  - \* radjimt\_jvalues.pdf
  - \* radjimt\_mixrat.pdf
  - \* traject
- util
  - \* latex
- util\_latex
  - \* chem.sty
  - \* citefind.awk
  - \* citetags.awk
  - \* egu.bst
- xcaaba
- xcaaba.py
- xcaaba.tcsh

The copyright of individual parts of the supplement might differ from the CC BY 4.0 License.
