# Supplementary figures and images for: The community atmospheric chemistry box model CAABA/MECCA-4.0
Source: Copernicus journal article supplement (doi:10.5194/gmd-12-1365-2019), 2019-04-05

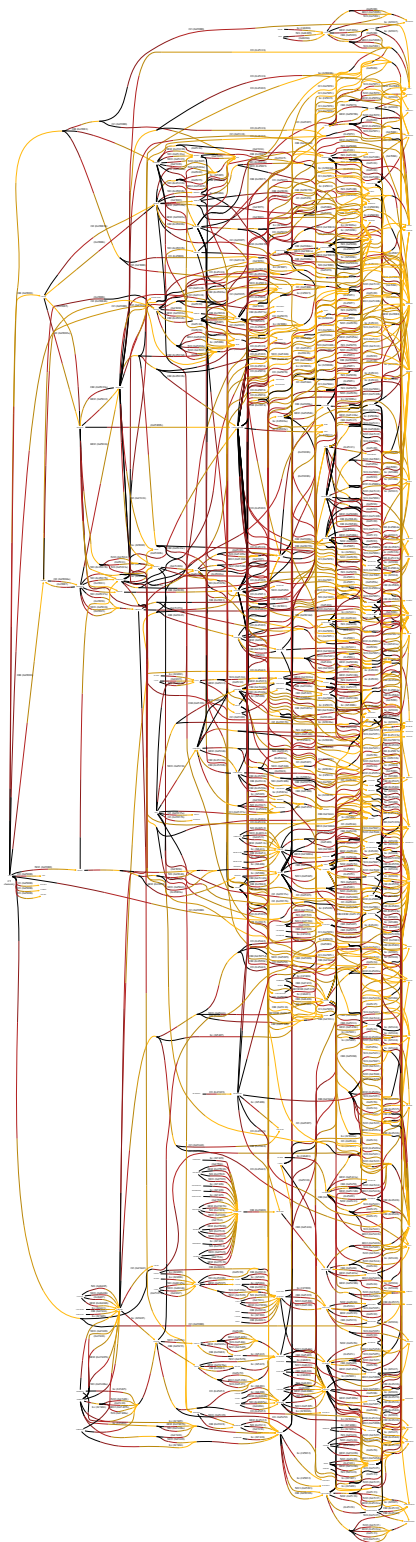

Supplement: Supplementary file 1 [file gmd-12-1365-2019-supplement.zip]

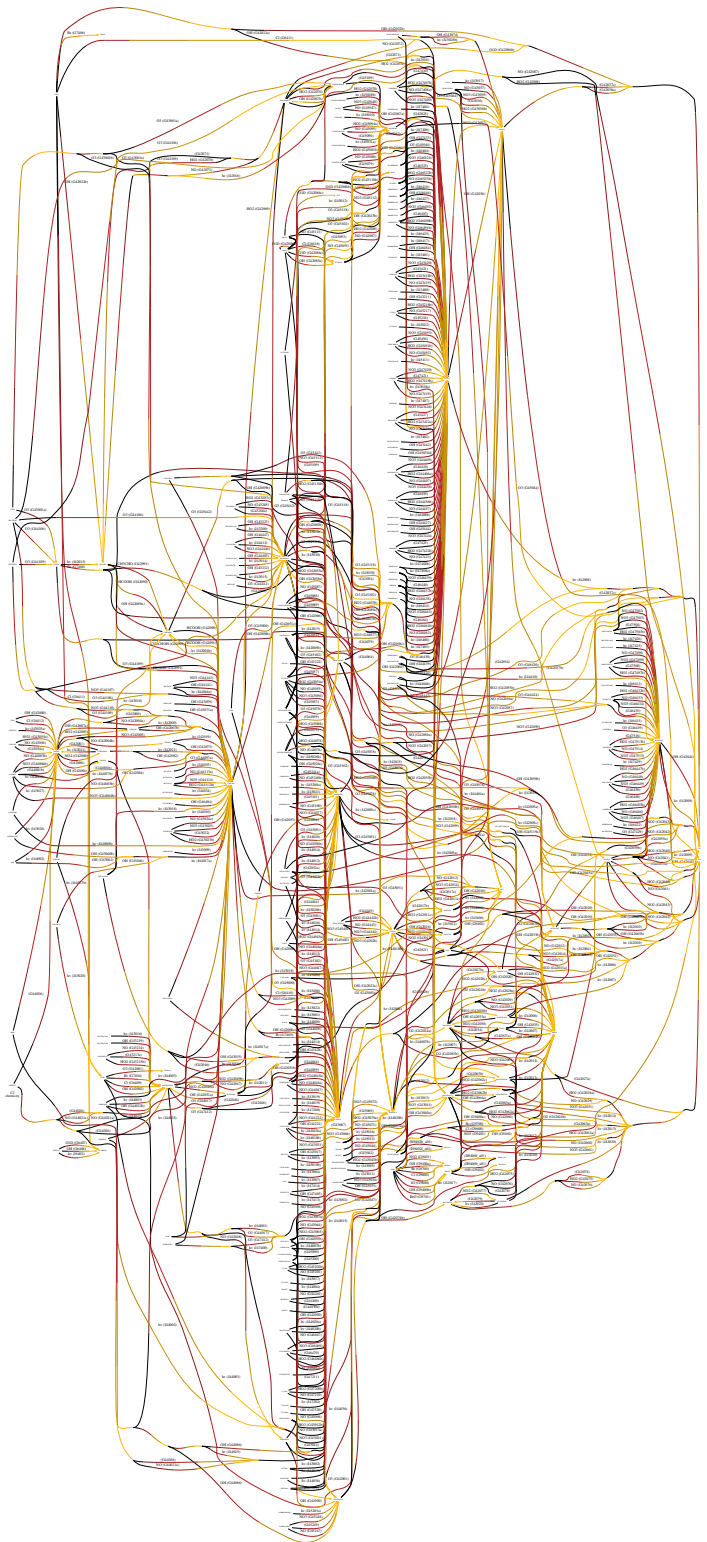

Supplement: Supplementary file 2 [file gmd-12-1365-2019-supplement.zip]

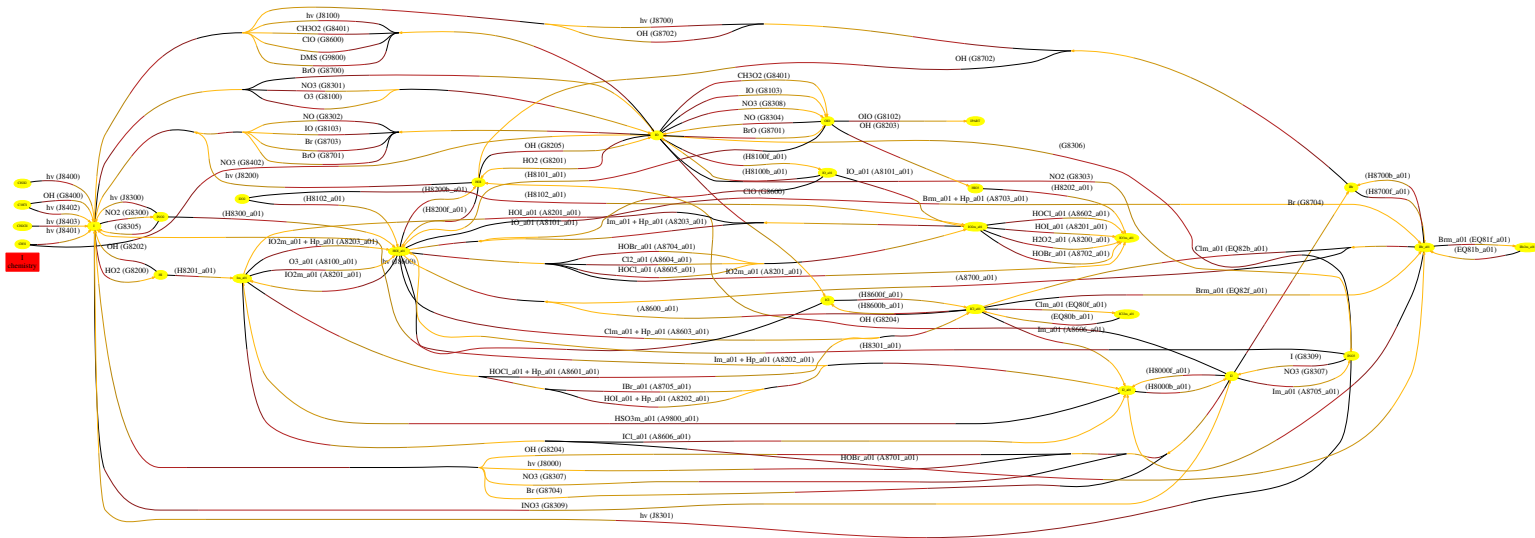

Supplement: Supplementary file 4 [file gmd-12-1365-2019-supplement.zip]

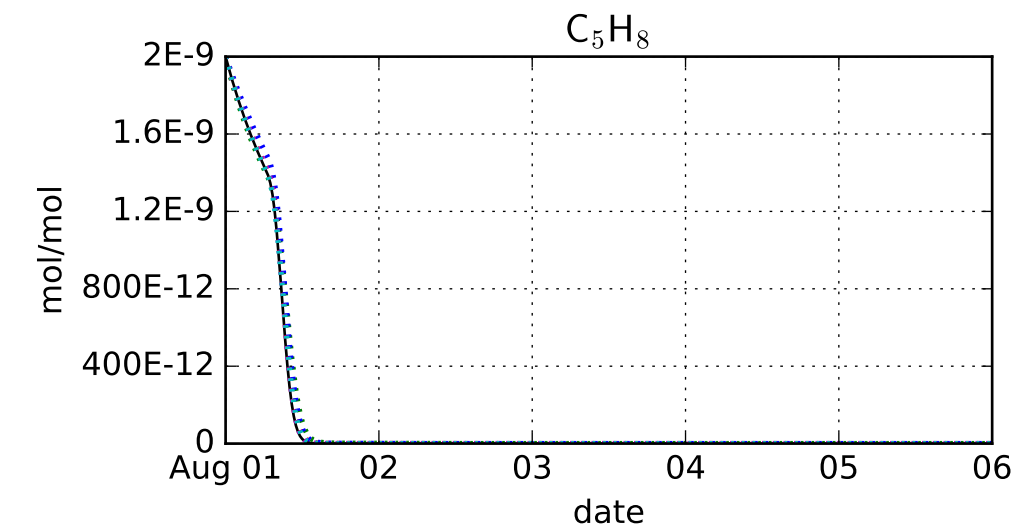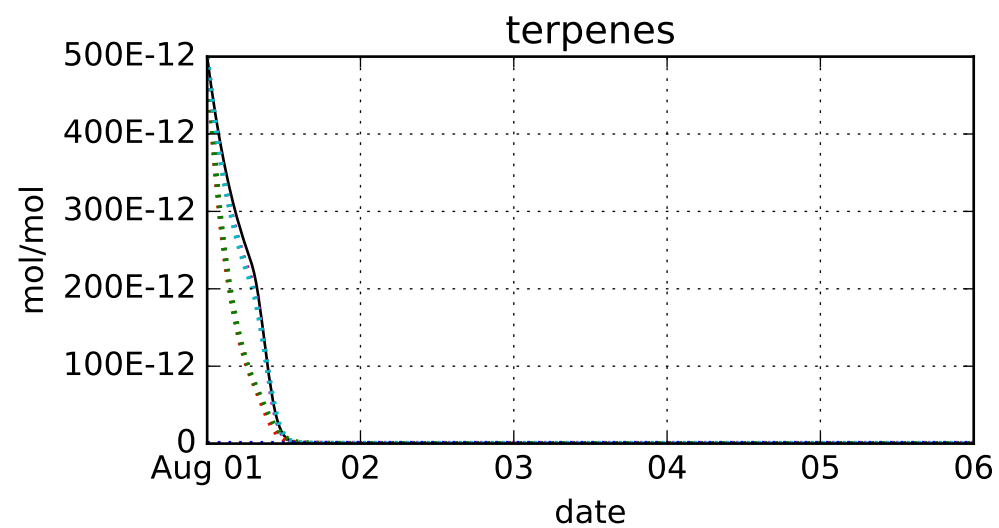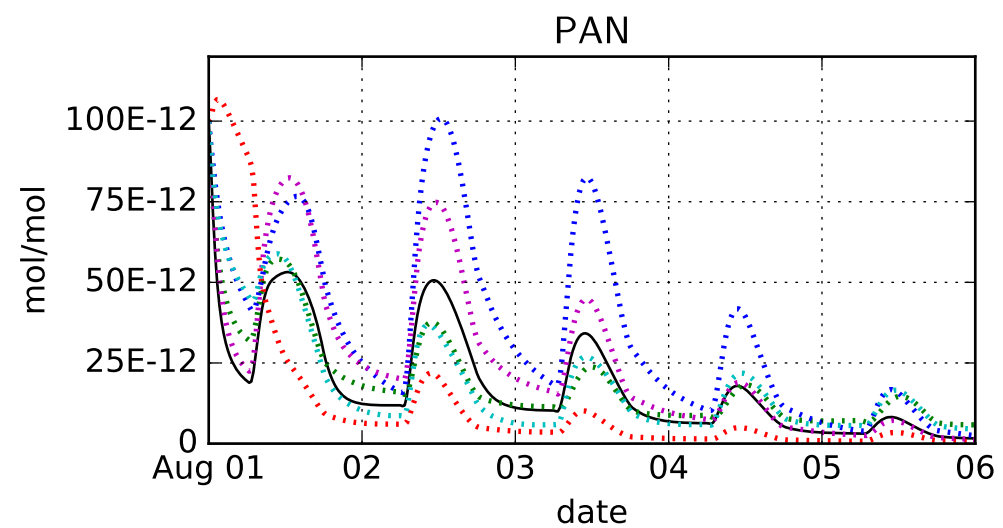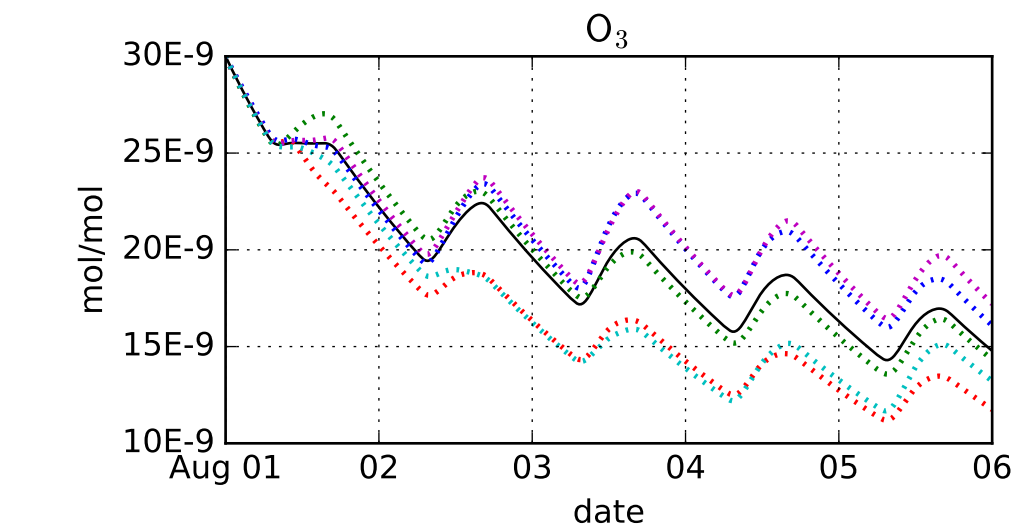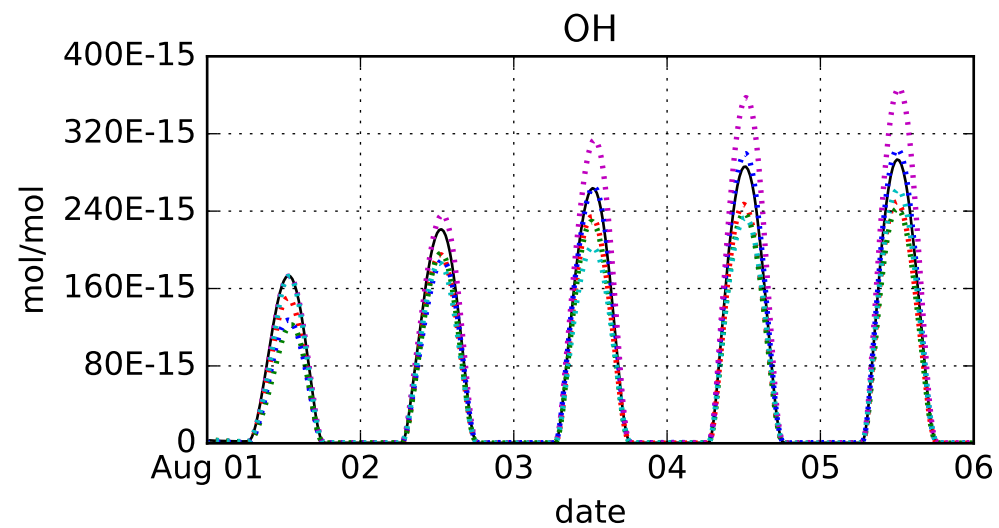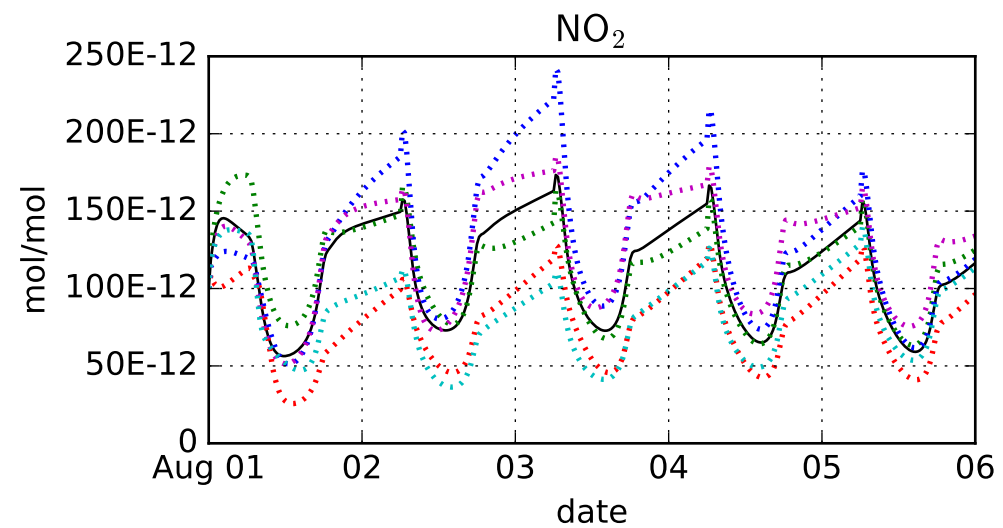

Supplement: Supplementary file 6 [file gmd-12-1365-2019-supplement.zip]

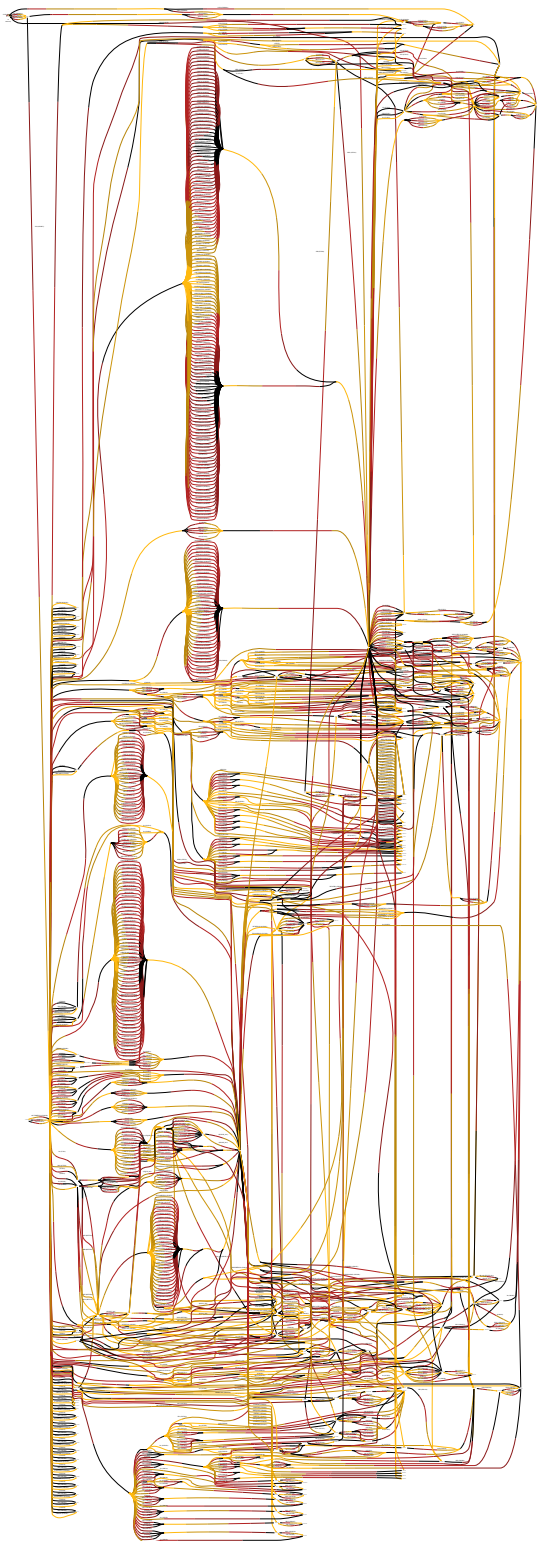

Supplement: Supplementary file 7 [file gmd-12-1365-2019-supplement.zip]

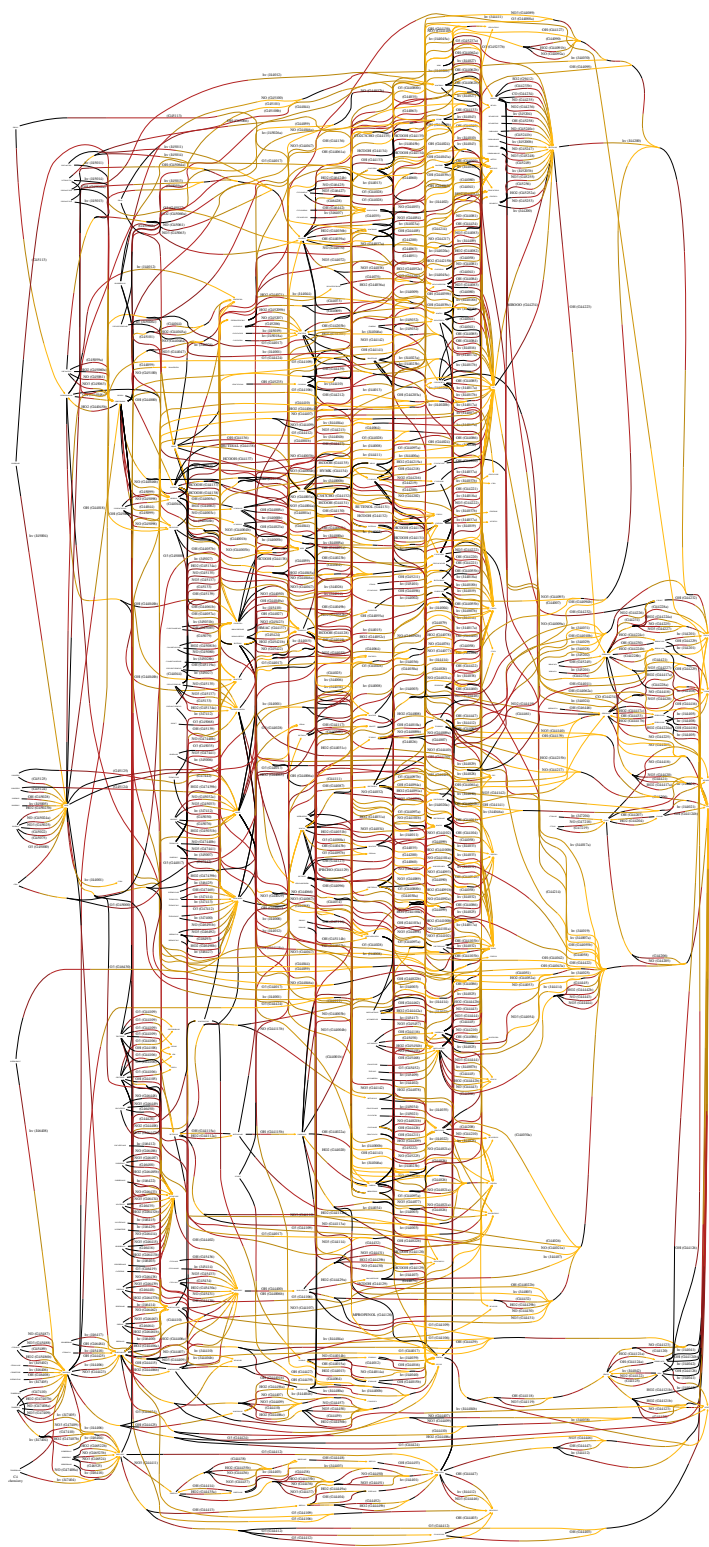

Supplement: Supplementary file 8 [file gmd-12-1365-2019-supplement.zip]

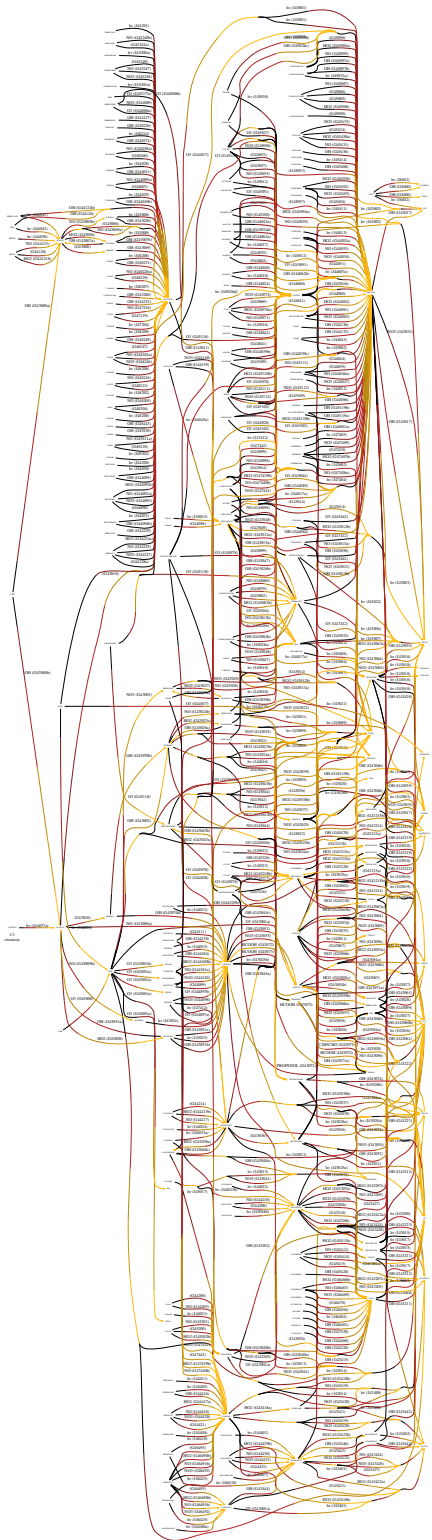

Supplement: Supplementary file 9 [file gmd-12-1365-2019-supplement.zip]

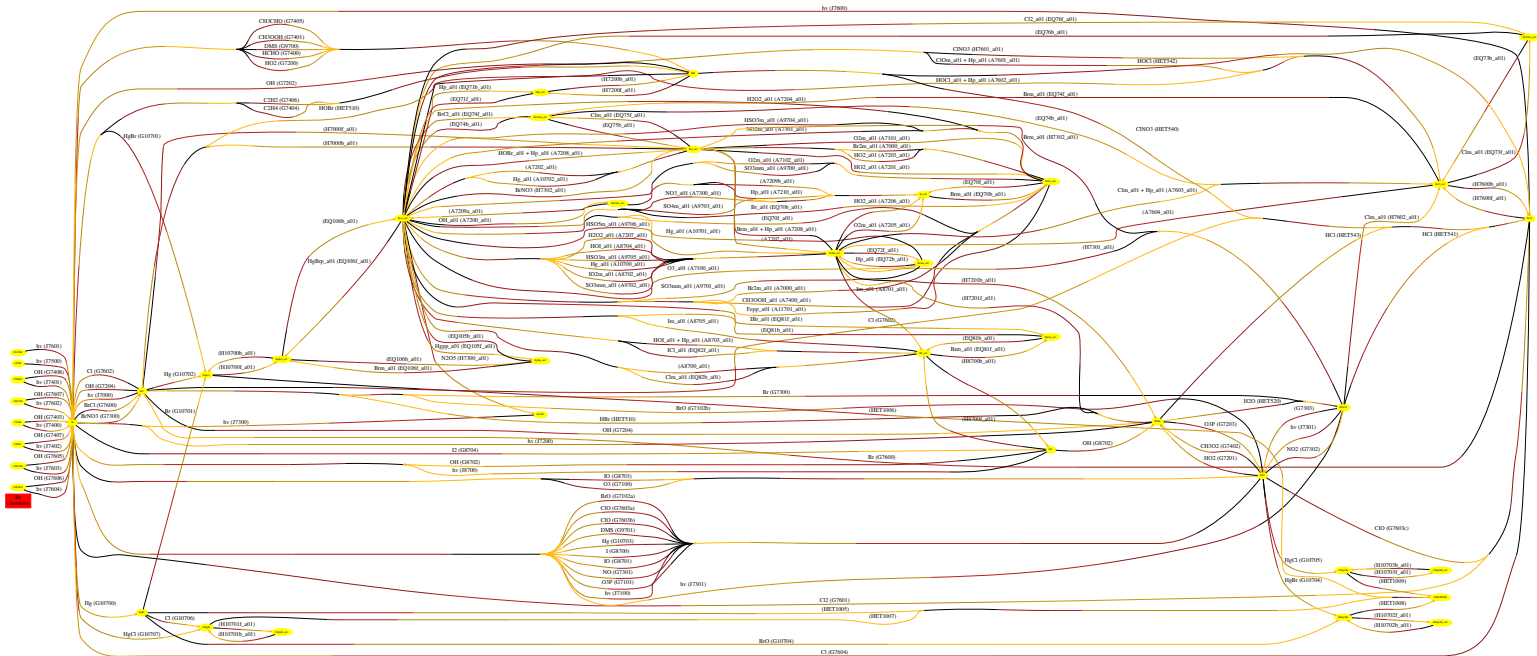

Supplement: Supplementary file 10 [file gmd-12-1365-2019-supplement.zip]

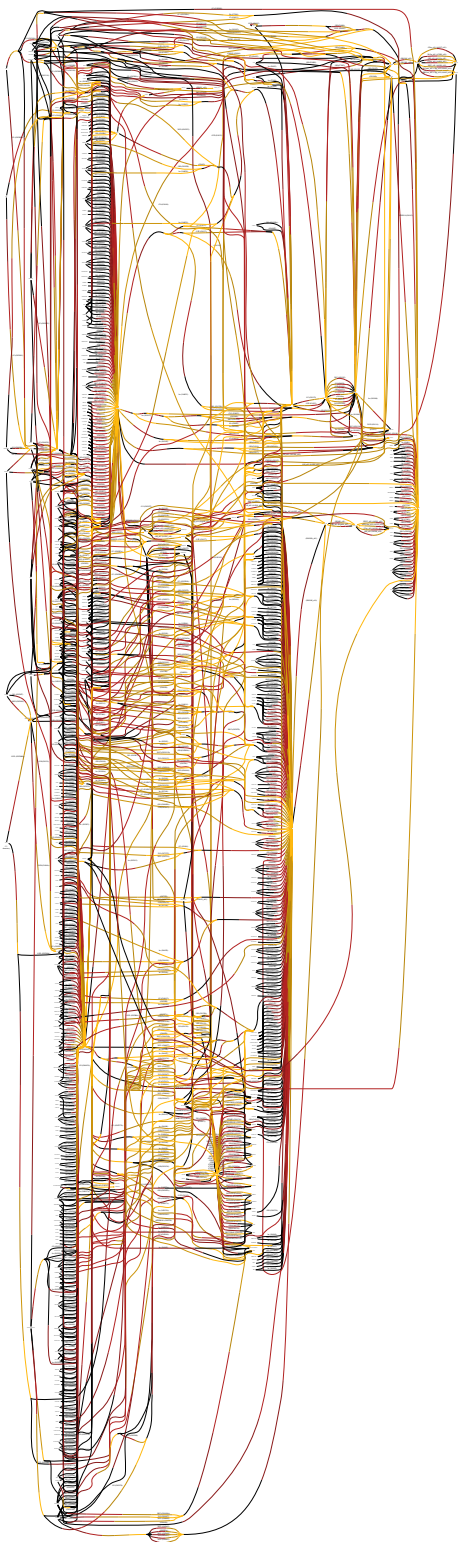

Supplement: Supplementary file 11 [file gmd-12-1365-2019-supplement.zip]
